# Supplementary material for: Experimental determination of metals generated during the thermal failure of lithium ion batteries
Source: Royal Society of Chemistry journal article supplement (doi:10.1039/d2ya00279e), 2023-01-01
Supplement: d2ya00279e1.pdf [file d2ya00279e1.pdf]

ELECTRONIC SUPPLEMENTARY INFORMATION

**Experimental determination of metals generated during the thermal failure of lithium ion batteries**

Jonathan EH Buston,<sup>\*a</sup> Jason Gill,<sup>a</sup> Rebecca Lisseman,<sup>a</sup> Jackie Morton,<sup>a</sup> Darren Musgrove<sup>a</sup> and Rhiannon CE Williams<sup>a</sup>

---

<sup>a</sup> HSE Science and Research Centre, Harpur Hill, Buxton, Derbyshire, United Kingdom, SK17 9JN.  
Jonathan.buston@hse.gov.uk

## ELECTRONIC SUPPLEMENTARY INFORMATION

|        |                                                            |        | Li | Ni | Mn | Co | Cu | Al |
|--------|------------------------------------------------------------|--------|----|----|----|----|----|----|
| Cell A | Metal from smoke particulate                               | Mass % | 13 | 26 | 14 | 30 | 3  | 14 |
|        |                                                            | Mole % | 51 | 13 | 7  | 14 | 1  | 14 |
|        | Metal Residues from swabbing near the positive end of cell | Mass % | 7  | 10 | 5  | 53 | 5  | 20 |
|        |                                                            | Mole % | 34 | 6  | 3  | 30 | 2  | 25 |
|        | Metal Residues from swabbing elsewhere                     | Mass % | 5  | 10 | 5  | 54 | 6  | 20 |
|        |                                                            | Mole % | 26 | 6  | 4  | 34 | 3  | 27 |
| Cell B | Metal from smoke particulate                               | Mass % | 12 | 67 | 0  | 12 | 1  | 8  |
|        |                                                            | Mole % | 50 | 35 | 0  | 6  | 1  | 8  |
|        | Metal Residues from swabbing near the positive end of cell | Mass % | 5  | 68 | 0  | 13 | 3  | 11 |
|        |                                                            | Mole % | 28 | 46 | 0  | 8  | 2  | 16 |
|        | Metal Residues from swabbing elsewhere                     | Mass % | 4  | 71 | 0  | 13 | 3  | 9  |
|        |                                                            | Mole % | 25 | 50 | 0  | 9  | 2  | 14 |
| Cell C | Metal from smoke particulate                               | Mass % | 5  | 29 | 30 | 30 | 0  | 6  |
|        |                                                            | Mole % | 30 | 20 | 22 | 20 | 0  | 8  |
|        | Metal Residues from swabbing near the positive end of cell | Mass % | 6  | 21 | 20 | 21 | 0  | 32 |
|        |                                                            | Mole % | 26 | 12 | 12 | 12 | 0  | 38 |
|        | Metal Residues from swabbing elsewhere                     | Mass % | 2  | 17 | 15 | 18 | 1  | 47 |
|        |                                                            | Mole % | 11 | 10 | 9  | 10 | 1  | 59 |
| Cell D | Metal from smoke particulate                               | Mass % | 6  | 48 | 23 | 19 | 0  | 4  |
|        |                                                            | Mole % | 33 | 32 | 17 | 12 | 0  | 6  |
|        | Metal Residues from swabbing near the positive end of cell | Mass % | 4  | 47 | 22 | 19 | 0  | 8  |
|        |                                                            | Mole % | 23 | 34 | 17 | 13 | 0  | 13 |
|        | Metal Residues from swabbing elsewhere                     | Mass % | 4  | 41 | 19 | 16 | 1  | 19 |
|        |                                                            | Mole % | 21 | 27 | 13 | 11 | 1  | 27 |
| Cell E | Metal from smoke particulate                               | Mass % | 7  | 70 | 8  | 9  | 1  | 5  |
|        |                                                            | Mole % | 36 | 44 | 6  | 6  | 1  | 7  |
|        | Metal Residues from swabbing near the positive end of cell | Mass % | 5  | 62 | 7  | 8  | 7  | 11 |
|        |                                                            | Mole % | 25 | 43 | 5  | 6  | 5  | 16 |
|        | Metal Residues from swabbing elsewhere                     | Mass % | 5  | 55 | 7  | 7  | 13 | 13 |
|        |                                                            | Mole % | 27 | 37 | 4  | 5  | 8  | 19 |

ELECTRONIC SUPPLEMENTARY INFORMATION

|        |                                                            |        |    |    |    |    |   |    |
|--------|------------------------------------------------------------|--------|----|----|----|----|---|----|
| Cell F | Metal from smoke particulate                               | Mass % | 9  | 1  | 0  | 73 | 1 | 16 |
|        |                                                            | Mole % | 42 | 0  | 0  | 39 | 1 | 18 |
|        | Metal Residues from swabbing near the positive end of cell | Mass % | 5  | 1  | 0  | 74 | 1 | 19 |
|        |                                                            | Mole % | 27 | 0  | 0  | 46 | 1 | 26 |
|        | Metal Residues from swabbing elsewhere                     | Mass % | 4  | 1  | 0  | 79 | 1 | 15 |
|        |                                                            | Mole % | 23 | 1  | 0  | 53 | 1 | 22 |
| Cell G | Metal from smoke particulate                               | Mass % | 12 | 1  | 0  | 77 | 1 | 9  |
|        |                                                            | Mole % | 42 | 0  | 0  | 39 | 1 | 18 |
|        | Metal Residues from swabbing near the positive end of cell | Mass % | 6  | 0  | 0  | 86 | 1 | 7  |
|        |                                                            | Mole % | 27 | 0  | 0  | 46 | 1 | 26 |
|        | Metal Residues from swabbing elsewhere                     | Mass % | 7  | 0  | 0  | 85 | 5 | 3  |
|        |                                                            | Mole % | 23 | 0  | 0  | 53 | 1 | 22 |
| Cell H | Metal from smoke particulate                               | Mass % | 5  | 38 | 33 | 15 | 2 | 7  |
|        |                                                            | Mole % | 29 | 26 | 24 | 10 | 1 | 10 |
|        | Metal Residues from swabbing near the positive end of cell | Mass % | 6  | 24 | 31 | 9  | 7 | 23 |
|        |                                                            | Mole % | 30 | 13 | 19 | 5  | 4 | 29 |
|        | Metal Residues from swabbing elsewhere                     | Mass % | 4  | 24 | 36 | 10 | 8 | 18 |
|        |                                                            | Mole % | 23 | 15 | 25 | 7  | 5 | 25 |
| Cell I | Metal from smoke particulate                               | Mass % | 5  | 44 | 26 | 19 | 0 | 6  |
|        |                                                            | Mole % | 29 | 30 | 19 | 13 | 0 | 9  |
|        | Metal Residues from swabbing near the positive end of cell | Mass % | 4  | 43 | 25 | 19 | 0 | 9  |
|        |                                                            | Mole % | 23 | 30 | 19 | 13 | 0 | 15 |
|        | Metal Residues from swabbing elsewhere                     | Mass % | 3  | 40 | 20 | 18 | 0 | 19 |
|        |                                                            | Mole % | 18 | 27 | 15 | 13 | 0 | 27 |
